# Supplementary material for: Feature related multi-view nonnegative matrix factorization for identifying conserved functional modules in multiple biological networks
Source: Springer Nature journal article supplement (doi:10.1186/s12859-018-2434-5), 2018-10-29
Supplement: 12859_2018_2434_MOESM1_ESM.pdf [file 12859_2018_2434_MOESM1_ESM.pdf]

# Feature Related Multi-view Nonnegative Matrix Factorization for Identifying Conserved Functional Modules in Multiple Biological Networks

Peizhuo Wang, Lin Gao\*, Yuxuan Hu, Feng Li

School of Computer Science and Technology, Xidian University, 710071 Xi'an, China

E-mails: [wangpeizhuo\\_37@163.com](mailto:wangpeizhuo_37@163.com), [lgao@mail.xidian.edu.cn](mailto:lgao@mail.xidian.edu.cn), [772437602@qq.com](mailto:772437602@qq.com),

[lifeng\\_10\\_28@163.com](mailto:lifeng_10_28@163.com)

\* To whom correspondence should be addressed

## Supplementary Methods

### 1. Multi-view symmetric NMF algorithm

The multi-view symmetric NMF problem minimize the following objective function:

$$\mathcal{F}(\mathbf{H}^{(v)}, \mathbf{H}_c) = \sum_{v=s,p} \left\| \mathbf{X}^{(v)} - \mathbf{H}^{(v)} (\mathbf{H}^{(v)})^T \right\|_F^2 + \sum_{v=s,p} \lambda_v \left\| \mathbf{H}^{(v)} - \mathbf{H}_c \right\|_F^2 \quad (1)$$

with the constraints  $\mathbf{H}^{(v)} \geq 0$  and  $\mathbf{H}_c \geq 0$ , where  $\mathbf{X}^{(v)}$  is a symmetric matrix for each  $v = s, p$ .

The objective function in eq. (1) is a non-convex function with respect to the entries of  $\mathbf{H}^{(v)}$  and  $\mathbf{H}_c$ , and has multiple local minima. Therefore, it is unrealistic to design an algorithm to find the global minimum solution. Thus, we derive the multiplicative update algorithm to find a local minimum of this problem.

The computation of  $\mathbf{H}^{(s)}$  and  $\mathbf{H}^{(p)}$  are independent. Therefore, we use  $\mathbf{X}$  and  $\mathbf{H}$  to represent  $\mathbf{X}^{(v)}$  and  $\mathbf{H}^{(v)}$  for brevity. Based on the simple knowledge of linear algebra, the objective function  $\mathcal{F}$  can be reformulated as follows:

$$\mathcal{F} = tr(\mathbf{X}\mathbf{X}^T - 2\mathbf{X}\mathbf{H}\mathbf{H}^T + \mathbf{H}\mathbf{H}^T\mathbf{H}\mathbf{H}^T) + tr\left[\lambda_v(\mathbf{H}\mathbf{H}^T - 2\mathbf{H}\mathbf{H}_c^T + \mathbf{H}_c\mathbf{H}_c^T)\right] \quad (2)$$

We first fix  $\mathbf{H}_c$  and compute  $\mathbf{H}^{(v)}$ . Let  $\phi_{ij}$  be the Lagrange multiplier for constraint  $\mathbf{H}_{ij} \geq 0$ .

KKT condition. The Lagrange  $\mathbb{L}$  is

$$\begin{aligned} \mathbb{L} = & tr(\mathbf{X}\mathbf{X}^T) - 2tr(\mathbf{X}\mathbf{H}\mathbf{H}^T) + tr(\mathbf{H}\mathbf{H}^T\mathbf{H}\mathbf{H}^T) \\ & + \lambda_v tr(\mathbf{H}\mathbf{H}^T) - 2\lambda_v tr(\mathbf{H}\mathbf{H}_c^T) + \lambda_v tr(\mathbf{H}_c\mathbf{H}_c^T) + tr(\Phi\mathbf{H}^T) \end{aligned} \quad (3)$$

where  $\Phi = [\phi_{ij}]$ . The partial derivatives of  $\mathbb{L}$  with respect to  $\mathbf{H}$  is:

$$\frac{\partial \mathbb{L}}{\partial \mathbf{H}} = -2(\mathbf{X} + \mathbf{X}^T)\mathbf{H} + 4\mathbf{H}^T\mathbf{H}\mathbf{H}^T + 2\lambda_v\mathbf{H} - 2\lambda_v\mathbf{H}_c + \Phi \quad (4)$$

Since  $\mathbf{X}$  is symmetric, eq. (4) can be rewritten as:

$$\frac{\partial \mathbb{L}}{\partial \mathbf{H}} = -4\mathbf{X}\mathbf{H} + 4\mathbf{H}^T\mathbf{H}\mathbf{H}^T + 2\lambda_v\mathbf{H} - 2\lambda_v\mathbf{H}_c + \Phi \quad (5)$$

Based on the KKT conditions  $\phi_{ij}\mathbf{H}_{ij} = 0$ , we get the following equations for  $\mathbf{H}_{ij}$ :

$$\phi_{ij}\mathbf{H}_{ij} = 2\left[2\mathbf{X}\mathbf{H} - 2\mathbf{H}^T\mathbf{H}\mathbf{H}^T + \lambda_v(\mathbf{H} - \mathbf{H}_c)\right]_{ij} H_{ij} = 0 \quad (6)$$

Then we can get the following updating rule:

$$\mathbf{H}_{ij} \leftarrow \mathbf{H}_{ij} \frac{(2\mathbf{X}\mathbf{H} + \lambda_v\mathbf{H}_c)_{ij}}{(2\mathbf{H}\mathbf{H}^T\mathbf{H} + \lambda_v\mathbf{H})_{ij}} \quad (7)$$

Second, we fix  $\mathbf{H}^{(v)}$  for each  $v$ , we take the derivative of the objective  $\mathcal{F}$  over  $\mathbf{H}_c$  and obtain an exact solution:

$$\mathbf{H}_c = \frac{\sum_{v=s,p} \lambda_v \mathbf{H}^{(v)}}{\sum_{v=s,p} \lambda_v} \geq 0 \quad (8)$$

## 2. Synthetic networks

### 2.1 Synthetic networks #1

Firstly, we set  $M = 30$  networks and  $N = 500$  nodes. Each network has the same node set. We generate each background network as matrix  $\mathbf{W}^{(t)}$ , where  $t = 1, 2, \dots, 30$ . The  $(i, j)$  element of matrix  $\mathbf{W}^{(t)}$  is defined as  $w_{ij}^{(t)} = u$ , where  $u \sim \text{Unif}(0, 1)$ . Then, we set five conserved modules

$C = \{C_1, C_2, C_3, C_4, C_5\}$ , where  $C_k = \{x | x = 80(k-1) + j, j = 1, 2, \dots, 80\}$ . The underlying modules in each network are generated as follows:

$$\begin{aligned} w_{ij}^{(1)}, \dots, w_{ij}^{(25)} &= \begin{cases} 1, & \text{if } i, j \in C_1 \\ 0, & \text{others} \end{cases}, \\ w_{ij}^{(1)}, \dots, w_{ij}^{(20)} &= \begin{cases} 1, & \text{if } i, j \in C_2 \\ 0, & \text{others} \end{cases}, \\ w_{ij}^{(1)}, \dots, w_{ij}^{(15)} &= \begin{cases} 1, & \text{if } i, j \in C_3 \\ 0, & \text{others} \end{cases}, \\ w_{ij}^{(1)}, \dots, w_{ij}^{(10)} &= \begin{cases} 1, & \text{if } i, j \in C_4 \\ 0, & \text{others} \end{cases}, \\ w_{ij}^{(1)}, \dots, w_{ij}^{(5)} &= \begin{cases} 1, & \text{if } i, j \in C_5 \\ 0, & \text{others} \end{cases}, \end{aligned}$$

Besides, there is only one random module of size 80 in each of  $\mathbf{W}^{(26)}, \mathbf{W}^{(27)}, \dots, \mathbf{W}^{(30)}$ .

For each network, we randomly flip  $1 - \alpha$  ( $0 \leq \alpha \leq 1$ ) fraction of 1 entries in each matrix to 0 and  $\beta$  ( $0 \leq \beta \leq \alpha$ ) fraction of 0 entries to 1. To embed edge weight for each network, we set

$$w_{ij}^{(t)} := \begin{cases} \min(w_{ij}^{(t)} + \Delta^{(t)}, 0), & \text{if } w_{ij}^{(t)} = 0 \\ \max(w_{ij}^{(t)} - \Delta^{(t)}, 1), & \text{if } w_{ij}^{(t)} = 1 \end{cases},$$

where  $\Delta_{ij}^{(t)} \sim N(0.25, 0.1)$ . In the end, we let  $\mathbf{W}^{(t)} := 0.5 \times (\mathbf{W}^{(t)} + (\mathbf{W}^{(t)})^T)$  and  $w_{ii}^{(t)} = 0$ .

## 2.2 Synthetic networks #2

Firstly, we set  $M = 15$  networks and  $N = 500$  nodes. Each network has the same node set. We generate each background network as matrix  $\mathbf{W}^{(t)}$ , where  $t = 1, 2, \dots, 30$ . The  $(i, j)$  element of

matrix  $\mathbf{W}^{(t)}$  is defined as  $w_{ij}^{(t)} = u$ , where  $u \sim \text{Unif}(0, 1)$ . Then, we set two conserved modules

$C = \{C_1, C_2\}$ , where  $C_1 = \{x | x = 1, 2, \dots, 50\}$  and  $C_2 = \{x | x = 401, 402, \dots, 440\}$ . The

underlying modules in each network are generated as follows:

$$\begin{aligned} w_{ij}^{(1)}, \dots, w_{ij}^{(5)} &= \begin{cases} 1, & \text{if } i, j \in C_1 \text{ or } i, j \in P^{(t)} \\ 0, & \text{others} \end{cases}, \\ w_{ij}^{(6)}, \dots, w_{ij}^{(10)} &= \begin{cases} 1, & \text{if } i, j \in C_1 \cup C_2 \text{ or } i, j \in P^{(t)} \text{ or } i, j \in Q^{(t)} \\ 0, & \text{others} \end{cases}, \\ w_{ij}^{(10)}, \dots, w_{ij}^{(15)} &= \begin{cases} 1, & \text{if } i, j \in C_2 \text{ or } i, j \in Q^{(t)} \\ 0, & \text{others} \end{cases}, \end{aligned}$$

where  $P^{(t)}$  is a set, which is randomly selected from  $\{x | x = 1, 2, \dots, 500 \text{ and } x \notin C_1\}$ , with size

$10 \times (11 - t)$  ( $t = 1, 2, \dots, 10$ ), and  $Q^{(t)}$ , which is randomly selected from

$\{x | x = 1, 2, \dots, 500 \text{ and } x \notin C_2\}$ , with size  $5 \times (t - 2)$  ( $t = 6, 7, \dots, 15$ ).

For each network, we randomly flip  $1 - \alpha$  ( $0 \leq \alpha \leq 1$ ) fraction of 1 entries in each matrix to 0 and  $\beta$  ( $0 \leq \beta \leq \alpha$ ) fraction of 0 entries to 1. To embed edge weight for each network, we set

$$w_{ij}^{(t)} := \begin{cases} \min(w_{ij}^{(t)} + \Delta^{(t)}, 0), & \text{if } w_{ij}^{(t)} = 0 \\ \max(w_{ij}^{(t)} - \Delta^{(t)}, 1), & \text{if } w_{ij}^{(t)} = 1 \end{cases},$$

where  $\Delta_{ij}^{(t)} \sim N(0.25, 0.1)$ . In the end, let  $\mathbf{W}^{(t)} := 0.5 \times (\mathbf{W}^{(t)} + (\mathbf{W}^{(t)})^T)$  and  $w_{ii}^{(t)} = 0$ .

## Supplementary Figures

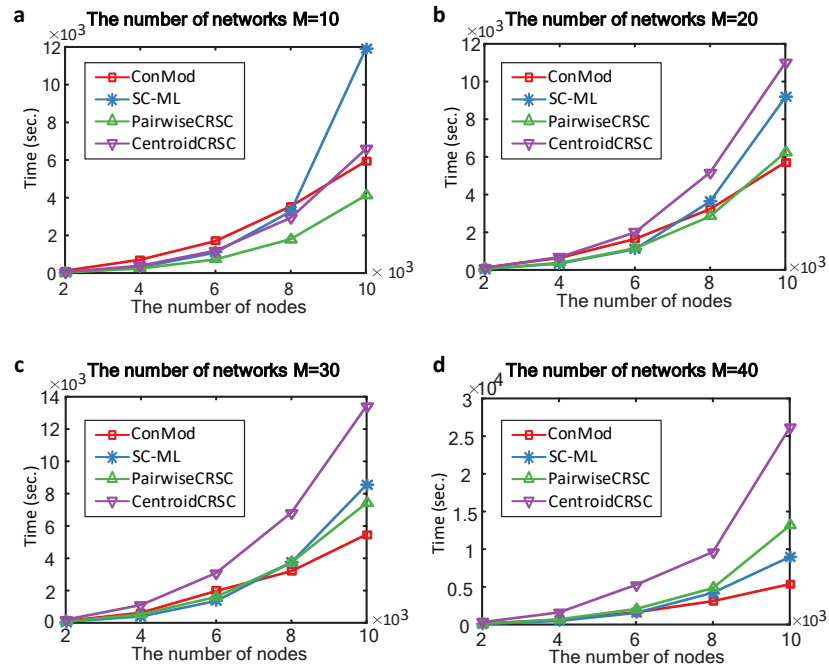

**Figure S1** The running time when varying the number of nodes from 2,000 to 10,000 and keeping the number of networks as (a) 10, (b) 20, (c) 30 and (d) 40, respectively.

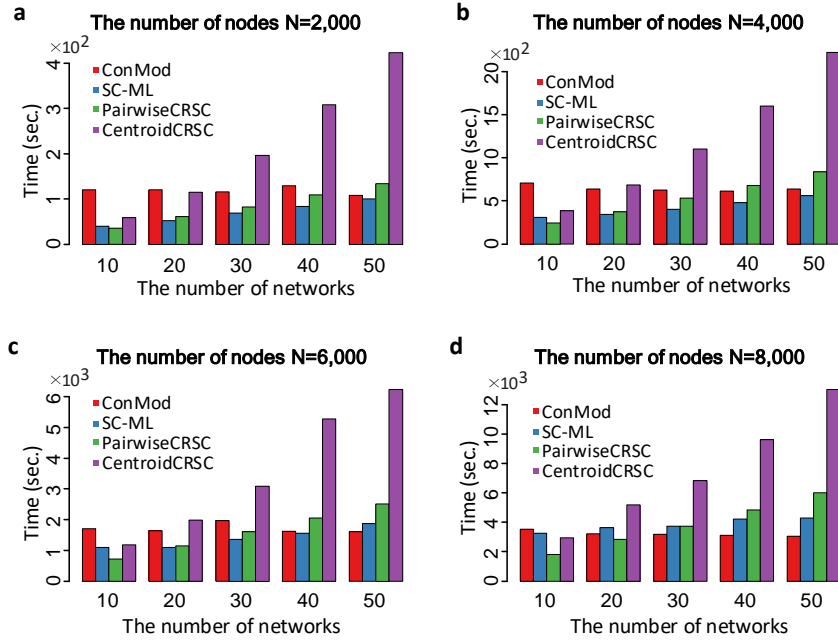

**Figure S2** The running time when varying the number of networks from 10 to 50 and keeping each network size as (a) 2,000, (b) 4,000, (c) 6,000 and (d) 8,000, respectively.

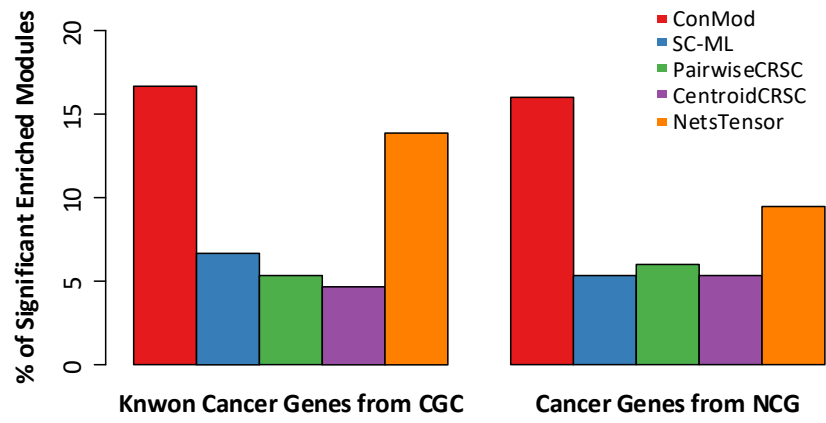

**Figure S3** The percentage of modules which significant enriched into known cancer genes from CGC[1] and cancer genes from NCG[2] respectively.

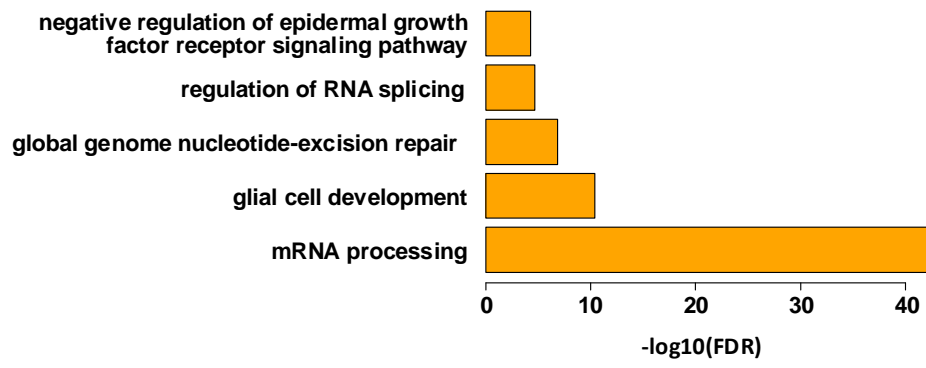

**Figure S4** Significant GO biological processes of the top five conserved modules in human brain tissue-specific interaction networks.

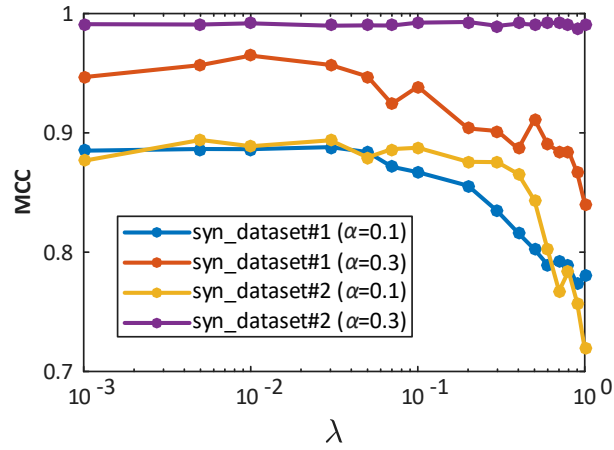

**Figure S5** The average MCC on synthetic dataset #1 and #2 with  $\alpha = 0.1$  and  $\alpha = 0.3$  respectively when varying parameter  $\lambda_v$  ( $\lambda_v = \lambda_s = \lambda_p$ ) from  $10^{-3}$  to 1. The optimal values appear when  $\lambda_v$  is around 0.01.



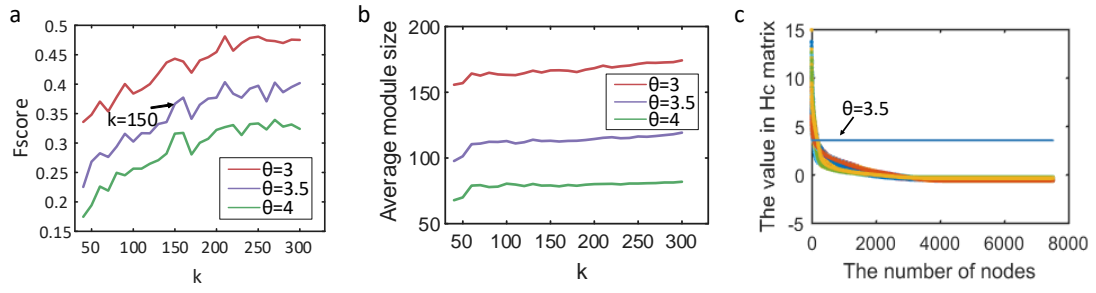

**Figure S6** The impact of parameters on cancer type-specific gene co-expression networks. (a) The f-score values of ConMod when varying the number of candidate modules  $k$  from 40 to 300. Results on  $\theta = 3, 3.5$  and 4 are given. The f-scores have no significant increase after  $k = 150$ . (b) The average module size w.r.t. the number of candidate modules. (c) The values with a descending order in the consensus factor matrix  $\mathbf{Hc}$ . We select  $\theta = 3.5$  to get module members with significant high values in each column of  $\mathbf{Hc}$  matrix.

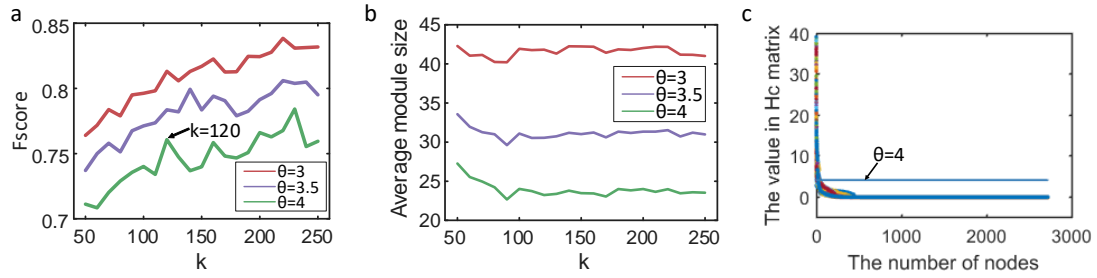

**Figure S7** The impact of parameters on brain tissue-specific PPI networks. (a) The f-score values of ConMod when varying the number of candidate modules  $k$  from 50 to 250. Results on  $\theta = 3, 3.5$  and 4 are given. The f-scores have no significant increase after  $k = 120$ . (b) The average module size w.r.t. the number of candidate modules. (c) The values with a descending order in the consensus factor matrix  $\mathbf{Hc}$ . We select  $\theta = 4$  to get module members with significant high values in each column of  $\mathbf{Hc}$  matrix.

## References:

1. Futreal PA, Coin L, Marshall M, Down T, Hubbard T, Wooster R, Rahman N, Stratton MR: **A census of human cancer genes.** *Nature Reviews Cancer* 2004, **4**:177.
2. Kuppili Venkata S, Repana D, Nulsen J, Dressler L, Bortolomeazzi M, Tournia A, Yakovleva A, Palmieri T, Ciccarelli FD: **The Network of Cancer Genes (NCG): a comprehensive catalogue of known and candidate cancer genes from cancer sequencing screens.** *bioRxiv* 2018.
